# Supplementary material
Source: publisher site journal article supplement (https://www.spandidos-publications.com/8578/downloadSupplementary)
Supplement: Supplementary file 1 [file downloadSupplementary]

**Table SI.** Search strategy.

| Database | Search strategy                                                                                                                                                                                                                                                                                                                                                                                                                                                                                                                                                                                                                                                                                                                                                                                                                                                                                                                                                                                                                                                                                                                                                                                                                                                                                                                                                                                                                                                                                                                                                                                                                                                                                                                                                                                                     |
|----------|---------------------------------------------------------------------------------------------------------------------------------------------------------------------------------------------------------------------------------------------------------------------------------------------------------------------------------------------------------------------------------------------------------------------------------------------------------------------------------------------------------------------------------------------------------------------------------------------------------------------------------------------------------------------------------------------------------------------------------------------------------------------------------------------------------------------------------------------------------------------------------------------------------------------------------------------------------------------------------------------------------------------------------------------------------------------------------------------------------------------------------------------------------------------------------------------------------------------------------------------------------------------------------------------------------------------------------------------------------------------------------------------------------------------------------------------------------------------------------------------------------------------------------------------------------------------------------------------------------------------------------------------------------------------------------------------------------------------------------------------------------------------------------------------------------------------|
| Pubmed   | <p>((("KRAS"[Mesh] OR "NRAS"[Mesh] OR "ras Proteins"[Mesh]) AND ("wild type"[tw] OR "wild-type"[tw] OR "wildtype"[tw])) OR ("RAS wild type"[tw] OR "RAS wild-type"[tw] OR "RAS wildtype"[tw] OR "KRAS wild type"[tw] OR "KRAS wild-type"[tw] OR "KRAS wildtype"[tw] OR "NRAS wild type"[tw] OR "NRAS wild-type"[tw] OR "NRAS wildtype"[tw]))</p> <p>AND</p> <p>(("Colorectal Neoplasms"[Mesh] OR "Colonic Neoplasms"[Mesh] OR "Rectal Neoplasms"[Mesh]) OR ("colorectal cancer"[tw] OR "colorectal carcinoma"[tw] OR "colorectal neoplasm"[tw] OR "colon cancer"[tw] OR "colon carcinoma"[tw] OR "rectal cancer"[tw] OR "rectal carcinoma"[tw] OR "CRC"[tw] OR "mCRC"[tw]))</p> <p>AND</p> <p>(("Neoplasm Metastasis"[Mesh] OR "Neoplasm Staging"[Mesh]) OR ("metastatic"[tw] OR "metastases"[tw] OR "advanced"[tw] OR "stage IV"[tw] OR "stage 4"[tw] OR "unresectable"[tw]))</p> <p>AND</p> <p>(("Drug Therapy, Combination"[Mesh] OR "Antineoplastic Agents"[Mesh] OR "Targeted Molecular Therapy"[Mesh] OR "Immunotherapy"[Mesh]) OR ("bevacizumab"[tw] OR "cetuximab"[tw] OR "panitumumab"[tw] OR "FOLFOX"[tw] OR "FOLFIRI"[tw] OR "CAPOX"[tw] OR "XELOX"[tw] OR "oxaliplatin"[tw] OR "irinotecan"[tw] OR "fluorouracil"[tw] OR "5-FU"[tw] OR "capecitabine"[tw] OR "leucovorin"[tw] OR "pembrolizumab"[tw] OR "nivolumab"[tw] OR "chemotherapy"[tw] OR "targeted therapy"[tw] OR "immunotherapy"[tw] OR "first line"[tw] OR "first-line"[tw] OR "firstline"[tw]))</p> <p>AND</p> <p>("Randomized Controlled Trial"[pt] OR "Controlled Clinical Trial"[pt] OR "randomized"[tw] OR "randomised"[tw] OR "randomly"[tw] OR "trial"[tw] OR "clinical trial"[tw])</p> <p>NOT</p> <p>("adjuvant"[tw] OR "neoadjuvant"[tw] OR "preoperative"[tw] OR "postoperative"[tw] OR "surgical"[tw])</p> <p>Filters: Humans</p> |
| Ovid     | <ol style="list-style-type: none"> <li>1. exp ras protein/ OR (("KRAS" OR "NRAS" OR "RAS") adj3 ("wild type" OR "wild-type" OR "wildtype")).tw.</li> <li>2. exp colorectal cancer/ OR exp colon cancer/ OR exp rectum cancer/</li> <li>3. (colorectal adj (cancer OR carcinoma OR neoplasm OR tumor OR tumour)).tw.</li> <li>4. (colon adj (cancer OR carcinoma OR neoplasm OR tumor OR tumour)).tw.</li> <li>5. (rectal adj (cancer OR carcinoma OR neoplasm OR tumor OR tumour)).tw.</li> <li>6. (CRC OR mCRC).tw.</li> <li>7. 2 OR 3 OR 4 OR 5 OR 6</li> <li>8. exp metastasis/ OR exp cancer staging/</li> <li>9. (metastatic OR metastases OR advanced OR "stage IV" OR "stage 4" OR unresectable).tw.</li> <li>10. 8 OR 9</li> <li>11. exp combination chemotherapy/ OR exp targeted therapy/ OR exp immunotherapy/</li> <li>12. (bevacizumab OR cetuximab OR panitumumab).tw.</li> <li>13. (FOLFOX OR FOLFIRI OR CAPOX OR XELOX).tw.</li> </ol>                                                                                                                                                                                                                                                                                                                                                                                                                                                                                                                                                                                                                                                                                                                                                                                                                                                              |

|                |                                                                                                                                                                                                                                                                                                                                                                                                                                                                                                                                                                                                                                                                                                                                                                                                                                                                                                                                                                                                                                                                              |
|----------------|------------------------------------------------------------------------------------------------------------------------------------------------------------------------------------------------------------------------------------------------------------------------------------------------------------------------------------------------------------------------------------------------------------------------------------------------------------------------------------------------------------------------------------------------------------------------------------------------------------------------------------------------------------------------------------------------------------------------------------------------------------------------------------------------------------------------------------------------------------------------------------------------------------------------------------------------------------------------------------------------------------------------------------------------------------------------------|
|                | <p>14. (oxaliplatin OR irinotecan OR fluorouracil OR "5-FU" OR capecitabine OR leucovorin).tw.<br/> 15. (pembrolizumab OR nivolumab OR ipilimumab).tw.<br/> 16. (chemotherapy OR "targeted therapy" OR immunotherapy).tw.<br/> 17. ("first line" OR "first-line" OR firstline).tw.<br/> 18. 11 OR 12 OR 13 OR 14 OR 15 OR 16 OR 17<br/> 19. exp randomized controlled trial/ OR exp controlled clinical trial/<br/> 20. (randomized OR randomised OR randomly OR trial OR "clinical trial").tw.<br/> 21. 19 OR 20<br/> 22. 1 AND 7 AND 10 AND 18 AND 21<br/> 23. limit 22 to (human)</p>                                                                                                                                                                                                                                                                                                                                                                                                                                                                                     |
| Web of science | <p>TS=((("KRAS wild type" OR "KRAS wild-type" OR "KRAS wildtype" OR "NRAS wild type" OR "NRAS wild-type" OR "NRAS wildtype" OR "RAS wild type" OR "RAS wild-type" OR "RAS wildtype")<br/> AND<br/> ("colorectal cancer" OR "colorectal carcinoma" OR "colorectal neoplasm" OR "colon cancer" OR "colon carcinoma" OR "rectal cancer" OR "rectal carcinoma" OR "CRC" OR "mCRC")<br/> AND<br/> ("metastatic" OR "metastases" OR "advanced" OR "stage IV" OR "stage 4" OR "unresectable")<br/> AND<br/> ("bevacizumab" OR "cetuximab" OR "panitumumab" OR "FOLFOX" OR "FOLFIRI" OR "CAPOX" OR "XELOX" OR "oxaliplatin" OR "irinotecan" OR "fluorouracil" OR "5-FU" OR "capecitabine" OR "leucovorin" OR "pembrolizumab" OR "nivolumab" OR "chemotherapy" OR "targeted therapy" OR "immunotherapy" OR "first line" OR "first-line" OR "firstline")<br/> AND<br/> ("randomized" OR "randomised" OR "trial" OR "clinical trial" OR "RCT"))<br/> NOT TS=("adjuvant" OR "neoadjuvant" OR "preoperative" OR "postoperative" OR "surgical")<br/> Filters: Document Types: Article;</p> |

**Table III.** Sensitivity analysis league table.

| A, Overall survival (nine nodes and all 15 trials) |                  |                   |                        |                     |                   |                  |                   |                   |                  |                   |
|----------------------------------------------------|------------------|-------------------|------------------------|---------------------|-------------------|------------------|-------------------|-------------------|------------------|-------------------|
| Treatment                                          | A140 + Chemo     | Bev + Chemo       | Bev + FOLFIRI (UGT1A1) | Bev + FOLFOX + VitC | Cet + Chemo       | Cet(maint.)      | FOLFIRI           | FOLFOX            | 5-FU/LV          | Pan + Chemo       |
| A140 + Chemo                                       | A140 + Chemo     | 0.94 (0.71-1.24)  | 1.35 (0.88-2.07)       | 0.90 (0.62-1.31)    | 1.10 (0.85-1.43)  | 0.89 (0.56-1.40) | 0.85 (0.61-1.19)  | 0.82 (0.58-1.14)  | 1.10 (0.70-1.71) | 1.10 (0.80-1.50)  |
| Bev + Chemo                                        | 1.07 (0.81-1.41) | Bev + Chemo       | 1.44 (1.05-1.99)*      | 0.96 (0.75-1.23)    | 1.17 (1.07-1.29)* | 0.95 (0.64-1.39) | 0.91 (0.73-1.12)  | 0.87 (0.70-1.09)  | 1.17 (0.82-1.66) | 1.17 (1.01-1.35)* |
| Bev + FOLFIRI (UGT1A1)                             | 0.74 (0.48-1.13) | 0.69 (0.50-0.95)* | Bev + FOLFIRI (UGT1A1) | 0.67 (0.44-1.00)*   | 0.81 (0.58-1.14)  | 0.66 (0.40-1.08) | 0.63 (0.43-0.93)* | 0.60 (0.41-0.89)* | 0.81 (0.50-1.30) | 0.81 (0.57-1.15)  |
| Bev + FOLFOX + VitC                                | 1.11 (0.76-1.61) | 1.04 (0.81-1.33)  | 1.50 (1.00-2.25)*      | Bev + FOLFOX + VitC | 1.22 (0.93-1.59)  | 0.98 (0.62-1.55) | 0.94 (0.68-1.31)  | 0.91 (0.65-1.27)  | 1.22 (0.79-1.87) | 1.22 (0.91-1.62)  |
| Cet + Chemo                                        | 0.91 (0.70-1.18) | 0.85 (0.77-0.94)* | 1.23 (0.88-1.72)       | 0.82 (0.63-1.07)    | Cet + Chemo       | 0.81 (0.56-1.17) | 0.77 (0.63-0.95)* | 0.74 (0.60-0.92)* | 1.00 (0.70-1.43) | 1.00 (0.84-1.18)  |
| Cet(maint.)                                        | 1.13 (0.71-1.78) | 1.06 (0.72-1.55)  | 1.53 (0.92-2.52)       | 1.02 (0.64-1.61)    | 1.24 (0.85-1.80)  | Cet(maint.)      | 0.96 (0.63-1.47)  | 0.92 (0.60-1.41)  | 1.24 (0.74-2.07) | 1.24 (0.82-1.86)  |
| FOLFIRI                                            | 1.17 (0.84-1.64) | 1.10 (0.89-1.36)  | 1.59 (1.08-2.33)*      | 1.06 (0.76-1.47)    | 1.29 (1.05-1.58)* | 1.04 (0.68-1.59) | FOLFIRI           | 0.96 (0.72-1.28)  | 1.29 (0.87-1.90) | 1.29 (1.03-1.61)* |
| FOLFOX                                             | 1.22 (0.87-1.71) | 1.15 (0.92-1.43)  | 1.66 (1.12-2.45)*      | 1.10 (0.79-1.54)    | 1.35 (1.09-1.66)* | 1.08 (0.71-1.66) | 1.04 (0.78-1.39)  | FOLFOX            | 1.34 (0.90-2.01) | 1.34 (1.05-1.72)* |
| 5-FU/LV                                            | 0.91 (0.58-1.42) | 0.86 (0.60-1.22)  | 1.23 (0.77-1.99)       | 0.82 (0.54-1.26)    | 1.00 (0.70-1.44)  | 0.81 (0.48-1.36) | 0.78 (0.53-1.15)  | 0.75 (0.50-1.12)  | 5-FU/LV          | 1.00 (0.73-1.37)  |
| Pan + Chemo                                        | 0.91 (0.67-1.24) | 0.86 (0.74-0.99)* | 1.23 (0.87-1.76)       | 0.82 (0.62-1.10)    | 1.00 (0.85-1.18)  | 0.81 (0.54-1.22) | 0.78 (0.62-0.97)* | 0.75 (0.58-0.96)* | 1.00 (0.73-1.37) | Pan + Chemo       |
| B, Progression-free survival (nine nodes)          |                  |                   |                        |                     |                   |                  |                   |                   |                  |                   |
| Treatment                                          | A140 + Chemo     | Bev + Chemo       | Bev + FOLFIRI (UGT1A1) | Bev + FOLFOX + VitC | Cet + Chemo       | Cet(maint.)      | FOLFIRI           | FOLFOX            | 5-FU/LV          | Pan + Chemo       |
| A140 + Chemo                                       | A140 + Chemo     | 0.91 (0.66-1.25)  | 1.68 (1.04-2.73)*      | 1.05 (0.69-1.62)    | 1.03 (0.77-1.38)  | 0.87 (0.51-1.48) | 0.56 (0.39-0.80)* | 0.76 (0.51-1.13)  | 0.88 (0.53-1.46) | 0.82 (0.57-1.16)  |
| Bev + Chemo                                        | 1.10 (0.80-1.53) | Bev + Chemo       | 1.86 (1.29-2.66)*      | 1.16 (0.88-1.54)    | 1.14 (0.99-1.31)  | 0.96 (0.60-1.53) | 0.61 (0.49-0.77)* | 0.83 (0.62-1.12)  | 0.97 (0.65-1.46) | 0.90 (0.75-1.08)  |

|                        |                   |                   |                        |                     |                   |                   |                   |                   |                   |                   |
|------------------------|-------------------|-------------------|------------------------|---------------------|-------------------|-------------------|-------------------|-------------------|-------------------|-------------------|
| Bev + FOLFIRI (UGT1A1) | 0.59 (0.37-0.97)* | 0.54 (0.38-0.77)* | Bev + FOLFIRI (UGT1A1) | 0.63 (0.40-0.99)*   | 0.61 (0.42-0.90)* | 0.51 (0.28-0.93)* | 0.33 (0.22-0.51)* | 0.45 (0.28-0.72)* | 0.52 (0.31-0.90)* | 0.49 (0.32-0.73)* |
| Bev + FOLFOX + VitC    | 0.95 (0.62-1.46)  | 0.86 (0.65-1.14)  | 1.60 (1.01-2.52)*      | Bev + FOLFOX + VitC | 0.98 (0.71-1.34)  | 0.82 (0.48-1.42)  | 0.53 (0.37-0.76)* | 0.72 (0.48-1.08)  | 0.84 (0.51-1.37)  | 0.77 (0.55-1.08)  |
| Cet + Chemo            | 0.97 (0.72-1.30)  | 0.88 (0.77-1.01)  | 1.63 (1.11-2.40)*      | 1.02 (0.75-1.40)    | Cet + Chemo       | 0.84 (0.54-1.32)  | 0.54 (0.43-0.67)* | 0.73 (0.56-0.96)* | 0.86 (0.57-1.29)  | 0.79 (0.65-0.97)* |
| Cet(maint.)            | 1.16 (0.68-1.97)  | 1.05 (0.65-1.67)  | 1.94 (1.07-3.51)*      | 1.22 (0.70-2.11)    | 1.19 (0.76-1.86)  | Cet(maint.)       | 0.64 (0.39-1.06)  | 0.87 (0.52-1.48)  | 1.02 (0.55-1.87)  | 0.94 (0.58-1.54)  |
| FOLFIRI                | 1.80 (1.25-2.60)* | 1.63 (1.29-2.06)* | 3.03 (1.97-4.65)*      | 1.90 (1.32-2.73)*   | 1.85 (1.49-2.31)* | 1.56 (0.95-2.57)  | FOLFIRI           | 1.36 (0.98-1.90)  | 1.59 (1.04-2.41)* | 1.47 (1.19-1.82)* |
| FOLFOX                 | 1.32 (0.89-1.97)  | 1.20 (0.89-1.61)  | 2.22 (1.40-3.54)*      | 1.39 (0.93-2.09)    | 1.36 (1.04-1.79)* | 1.14 (0.68-1.93)  | 0.73 (0.53-1.02)  | FOLFOX            | 1.17 (0.73-1.86)  | 1.08 (0.80-1.46)  |
| 5-FU/LV                | 1.13 (0.68-1.88)  | 1.03 (0.69-1.54)  | 1.91 (1.11-3.28)*      | 1.19 (0.73-1.95)    | 1.17 (0.77-1.76)  | 0.98 (0.53-1.80)  | 0.63 (0.41-0.96)* | 0.86 (0.54-1.37)  | 5-FU/LV           | 0.93 (0.65-1.33)  |
| Pan + Chemo            | 1.22 (0.86-1.75)  | 1.11 (0.93-1.33)  | 2.06 (1.37-3.09)*      | 1.29 (0.92-1.81)    | 1.26 (1.03-1.54)* | 1.06 (0.65-1.73)  | 0.68 (0.55-0.84)* | 0.93 (0.69-1.25)  | 1.08 (0.75-1.55)  | Pan + Chemo       |

Analysis included UGT1A1-guided Bev + FOLFIRI, VitC + Bev + FOLFOX and A140 + FOLFOX nodes. \*P<0.05. Bev, bevacizumab; Chemo, chemotherapy; UGT1A1, UDP glucuronosyltransferase family 1 member A1; VitC, vitamin C; FOLFIRI, 5-fluorouracil, leucovorin and irinotecan; FOLFOX, 5-fluorouracil, leucovorin and oxaliplatin; 5-FU/LV, 5-fluorouracil/leucovorin; Cet, cetuximab; Cet(maint.), Cet maintenance.

**Table SIII.** League table.

| A, Overall survival (primary analysis, six nodes)          |                   |                   |                   |                    |                    |                   |                   |
|------------------------------------------------------------|-------------------|-------------------|-------------------|--------------------|--------------------|-------------------|-------------------|
| Treatment                                                  | Bev + Chemo       | Cet + Chemo       | Cet(maint.)       | FOLFIRI            | FOLFOX             | 5-FU/LV           | Pan + Chemo       |
| Bev + Chemo                                                | Bev + Chemo       | 1.17 (1.07-1.29)* | 0.95 (0.64-1.39)  | 0.91 (0.73-1.12)   | 0.87 (0.70-1.09)   | 1.17 (0.82-1.66)  | 1.17 (1.01-1.35)* |
| Cet + Chemo                                                | 0.85 (0.77-0.94)* | Cet + Chemo       | 0.81 (0.56-1.17)  | 0.77 (0.63-0.95)*  | 0.74 (0.60-0.92)*  | 1.00 (0.70-1.43)  | 1.00 (0.84-1.18)  |
| Cet(maint.)                                                | 1.06 (0.72-1.55)  | 1.24 (0.85-1.80)  | Cet(maint.)       | 0.96 (0.63-1.47)   | 0.92 (0.60-1.41)   | 1.24 (0.74-2.07)  | 1.24 (0.82-1.86)  |
| FOLFIRI                                                    | 1.10 (0.89-1.36)  | 1.29 (1.05-1.58)* | 1.04 (0.68-1.59)  | FOLFIRI            | 0.96 (0.72-1.28)   | 1.29 (0.87-1.90)  | 1.29 (1.03-1.61)* |
| FOLFOX                                                     | 1.15 (0.92-1.43)  | 1.35 (1.09-1.66)* | 1.08 (0.71-1.66)  | 1.04 (0.78-1.39)   | FOLFOX             | 1.34 (0.90-2.01)  | 1.34 (1.05-1.72)* |
| 5-FU/LV                                                    | 0.86 (0.60-1.22)  | 1.00 (0.70-1.44)  | 0.81 (0.48-1.36)  | 0.78 (0.53-1.15)   | 0.75 (0.50-1.12)   | 5-FU/LV           | 1.00 (0.73-1.37)  |
| Pan + Chemo                                                | 0.86 (0.74-0.99)* | 1.00 (0.85-1.18)  | 0.81 (0.54-1.22)  | 0.78 (0.62-0.97)*  | 0.75 (0.58-0.96)*  | 1.00 (0.73-1.37)  | Pan + Chemo       |
| B, Progression-free survival (primary analysis, six nodes) |                   |                   |                   |                    |                    |                   |                   |
| Treatment                                                  | Bev + Chemo       | Cet + Chemo       | Cet(maint.)       | FOLFIRI            | FOLFOX             | 5-FU/LV           | Pan + Chemo       |
| Bev + Chemo                                                | Bev + Chemo       | 1.14 (0.99-1.31)  | 0.96 (0.60-1.53)  | 0.61 (0.49-0.77)*  | 0.83 (0.62-1.12)   | 0.97 (0.65-1.46)  | 0.90 (0.75-1.08)  |
| Cet + Chemo                                                | 0.88 (0.77-1.01)  | Cet + Chemo       | 0.84 (0.54-1.32)  | 0.54 (0.43-0.67)*  | 0.73 (0.56-0.96)*  | 0.86 (0.57-1.29)  | 0.79 (0.65-0.97)* |
| Cet(maint.)                                                | 1.05 (0.65-1.67)  | 1.19 (0.76-1.86)  | Cet(maint.)       | 0.64 (0.39-1.06)   | 0.87 (0.52-1.48)   | 1.02 (0.55-1.87)  | 0.94 (0.58-1.54)  |
| FOLFIRI                                                    | 1.63 (1.29-2.06)* | 1.85 (1.49-2.31)* | 1.56 (0.95-2.57)  | FOLFIRI            | 1.36 (0.98-1.90)   | 1.59 (1.04-2.41)* | 1.47 (1.19-1.82)* |
| FOLFOX                                                     | 1.20 (0.89-1.61)  | 1.36 (1.04-1.79)* | 1.14 (0.68-1.93)  | 0.73 (0.53-1.02)   | FOLFOX             | 1.17 (0.73-1.86)  | 1.08 (0.80-1.46)  |
| 5-FU/LV                                                    | 1.03 (0.69-1.54)  | 1.17 (0.77-1.76)  | 0.98 (0.53-1.80)  | 0.63 (0.41-0.96)*  | 0.86 (0.54-1.37)   | 5-FU/LV           | 0.93 (0.65-1.33)  |
| Pan + Chemo                                                | 1.11 (0.93-1.33)  | 1.26 (1.03-1.54)* | 1.06 (0.65-1.73)  | 0.68 (0.55-0.84)*  | 0.93 (0.69-1.25)   | 1.08 (0.75-1.55)  | Pan + Chemo       |
| C, Objective response rate (primary analysis, six nodes)   |                   |                   |                   |                    |                    |                   |                   |
| Treatment                                                  | Bev + Chemo       | Cet + Chemo       | Cet(maint.)       | FOLFIRI            | FOLFOX             | 5-FU/LV           | Pan + Chemo       |
| Bev + Chemo                                                | Bev + Chemo       | 0.62 (0.42-0.92)* | 0.43 (0.19-0.99)* | 1.70 (0.92-3.14)   | 1.75 (0.91-3.36)   | 0.33 (0.11-0.99)* | 0.70 (0.31-1.55)  |
| Cet + Chemo                                                | 1.61 (1.09-2.39)* | Cet + Chemo       | 0.69 (0.33-1.44)  | 2.74 (1.71-4.39)*  | 2.81 (1.67-4.76)*  | 0.54 (0.20-1.48)  | 1.12 (0.56-2.25)  |
| Cet(maint.)                                                | 2.32 (1.01-5.33)* | 1.44 (0.69-2.99)  | Cet(maint.)       | 3.94 (1.65-9.41)*  | 4.05 (1.65-9.97)*  | 0.78 (0.22-2.70)  | 1.62 (0.59-4.43)  |
| FOLFIRI                                                    | 0.59 (0.32-1.09)  | 0.37 (0.23-0.59)* | 0.25 (0.11-0.61)* | FOLFIRI            | 1.03 (0.54-1.97)   | 0.20 (0.08-0.51)* | 0.41 (0.23-0.75)* |
| FOLFOX                                                     | 0.57 (0.30-1.10)  | 0.36 (0.21-0.60)* | 0.25 (0.10-0.61)* | 0.97 (0.51-1.87)   | FOLFOX             | 0.19 (0.07-0.54)* | 0.40 (0.19-0.84)* |
| 5-FU/LV                                                    | 2.99 (1.01-8.83)* | 1.85 (0.68-5.09)  | 1.29 (0.37-4.48)  | 5.08 (1.97-13.09)* | 5.22 (1.84-14.83)* | 5-FU/LV           | 2.08 (1.00-4.34)* |
| Pan + Chemo                                                | 1.43 (0.65-3.18)  | 0.89 (0.45-1.78)  | 0.62 (0.23-1.69)  | 2.44 (1.34-4.44)*  | 2.51 (1.19-5.27)*  | 0.48 (0.23-1.00)* | Pan + Chemo       |

\*P<0.05. Bev, bevacizumab; Chemo, chemotherapy; FOLFIRI, 5-fluorouracil, leucovorin and irinotecan; FOLFOX, 5-fluorouracil, leucovorin and oxaliplatin; 5-FU/LV, 5-fluorouracil/leucovorin; Cet, cetuximab; Cet(maint.), Cet maintenance.

**Table SIV.** Node-splitting: Direct vs. indirect evidence consistency.

| Outcome | Comparison                  | k (direct) | NMA (RE)            | Direct              | Indirect            | P-value (inconsistency) |
|---------|-----------------------------|------------|---------------------|---------------------|---------------------|-------------------------|
| OS      | Cet + Chemo vs. Bev + Chemo | 3          | 0.853 (0.775-0.938) | 0.855 (0.774-0.944) | 0.824 (0.570-1.192) | 0.853                   |
| OS      | Pan + Chemo vs. Bev + Chemo | 2          | 0.855 (0.738-0.992) | 0.850 (0.722-1.001) | 0.881 (0.624-1.244) | 0.853                   |
| OS      | Cet + Chemo vs. Cet_mono    | 1          | 0.806 (0.556-1.170) | 0.806 (0.556-1.170) |                     |                         |
| OS      | Cet + Chemo vs. FOLFIRI     | 2          | 0.775 (0.632-0.949) | 0.745 (0.587-0.946) | 0.856 (0.583-1.256) | 0.547                   |
| OS      | Cet + Chemo vs. FOLFOX      | 1          | 0.743 (0.604-0.915) | 0.760 (0.606-0.953) | 0.659 (0.389-1.117) | 0.627                   |
| OS      | FOLFIRI vs. Pan + Chemo     | 1          | 1.287 (1.028-1.610) | 1.190 (0.849-1.669) | 1.368 (1.014-1.845) | 0.547                   |
| OS      | FOLFOX vs. Pan + Chemo      | 1          | 1.341 (1.047-1.718) | 1.493 (0.907-2.456) | 1.295 (0.973-1.722) | 0.627                   |
| OS      | 5-FU/LV vs. Pan + Chemo     | 1          | 1.000 (0.727-1.375) | 1.000 (0.727-1.375) |                     |                         |
| PFS     | Cet + Chemo vs. Bev + Chemo | 3          | 0.880 (0.766-1.011) | 0.909 (0.782-1.055) | 0.711 (0.484-1.045) | 0.245                   |
| PFS     | Pan + Chemo vs. Bev + Chemo | 2          | 1.110 (0.925-1.331) | 1.040 (0.841-1.286) | 1.329 (0.933-1.893) | 0.245                   |
| PFS     | Cet + Chemo vs. Cet + Chemo | 1          | 0.840 (0.537-1.315) | 0.840 (0.537-1.315) |                     |                         |
| PFS     | Cet + Chemo vs. FOLFIRI     | 2          | 0.539 (0.433-0.673) | 0.505 (0.381-0.670) | 0.598 (0.420-0.851) | 0.467                   |
| PFS     | Cet + Chemo vs. FOLFOX      | 1          | 0.734 (0.559-0.964) | 0.690 (0.502-0.948) | 0.873 (0.514-1.482) | 0.455                   |
| PFS     | FOLFIRI vs. Pan + Chemo     | 1          | 1.470 (1.187-1.820) | 1.389 (1.068-1.806) | 1.643 (1.136-2.376) | 0.467                   |
| PFS     | FOLFOX vs. Pan + Chemo      | 1          | 1.080 (0.799-1.458) | 0.935 (0.576-1.516) | 1.182 (0.805-1.736) | 0.455                   |
| PFS     | 5-FU/LV vs. Pan + Chemo     | 1          | 0.926 (0.646-1.326) | 0.926 (0.646-1.326) |                     |                         |

OS, overall survival; PFS, progression-free survival; Bev, bevacizumab; Chemo, chemotherapy; FOLFIRI, 5-fluorouracil, leucovorin and irinotecan; FOLFOX, 5-fluorouracil, leucovorin and oxaliplatin; 5-FU/LV, 5-fluorouracil/leucovorin; Cet, cetuximab; Cet\_mono, cetuximab monotherapy as maintenance treatment; NMA, network meta-analysis; RE, random effects.

**Table SV.** Sensitivity analysis league table: Objective response rate (nine nodes).

| Treatment              | A140 + Chemo      | Bev + Chemo       | Bev + FOLFIRI (UGT1A1) | Cet + Chemo       | Cet(maint.)       | FOLFIRI            | FOLFOX             | 5-FU/LV           | Pan + Chemo       |
|------------------------|-------------------|-------------------|------------------------|-------------------|-------------------|--------------------|--------------------|-------------------|-------------------|
| A140 + Chemo           | A140 + Chemo      | 1.50 (0.85-2.63)  | 0.37 (0.15-0.92)*      | 0.93 (0.62-1.39)  | 0.65 (0.28-1.49)  | 2.55 (1.37-4.74)*  | 2.62 (1.35-5.08)*  | 0.50 (0.17-1.49)  | 1.04 (0.47-2.33)  |
| Bev + Chemo            | 0.67 (0.38-1.17)  | Bev + Chemo       | 0.25 (0.12-0.50)*      | 0.62 (0.42-0.92)* | 0.43 (0.19-0.99)* | 1.70 (0.92-3.14)   | 1.75 (0.91-3.36)   | 0.33 (0.11-0.99)* | 0.70 (0.31-1.55)  |
| Bev + FOLFIRI (UGT1A1) | 2.71 (1.09-6.76)* | 4.07 (1.98-8.33)* | Bev + FOLFIRI (UGT1A1) | 2.52 (1.11-5.72)* | 1.75 (0.58-5.25)  | 6.91 (2.69-17.76)* | 7.10 (2.69-18.77)* | 1.36 (0.37-4.99)  | 2.83 (0.97-8.28)  |
| Cet + Chemo            | 1.08 (0.72-1.61)  | 1.61 (1.09-2.39)* | 0.40 (0.17-0.90)*      | Cet + Chemo       | 0.69 (0.33-1.44)  | 2.74 (1.71-4.39)*  | 2.81 (1.67-4.76)*  | 0.54 (0.20-1.48)  | 1.12 (0.56-2.25)  |
| Cet(maint.)            | 1.55 (0.67-3.57)  | 2.32 (1.01-5.33)* | 0.57 (0.19-1.71)       | 1.44 (0.69-2.99)  | Cet(maint.)       | 3.94 (1.65-9.41)*  | 4.05 (1.65-9.97)*  | 0.78 (0.22-2.70)  | 1.62 (0.59-4.43)  |
| FOLFIRI                | 0.39 (0.21-0.73)* | 0.59 (0.32-1.09)  | 0.14 (0.06-0.37)*      | 0.37 (0.23-0.59)* | 0.25 (0.11-0.61)* | FOLFIRI            | 1.03 (0.54-1.97)   | 0.20 (0.08-0.51)* | 0.41 (0.23-0.75)* |
| FOLFOX                 | 0.38 (0.20-0.74)* | 0.57 (0.30-1.10)  | 0.14 (0.05-0.37)*      | 0.36 (0.21-0.60)* | 0.25 (0.10-0.61)* | 0.97 (0.51-1.87)   | FOLFOX             | 0.19 (0.07-0.54)* | 0.40 (0.19-0.84)* |
| 5-FU/LV                | 1.99 (0.67-5.91)  | 2.99 (1.01-8.83)* | 0.74 (0.20-2.69)       | 1.85 (0.68-5.09)  | 1.29 (0.37-4.48)  | 5.08 (1.97-13.09)* | 5.22 (1.84-14.83)* | 5-FU/LV           | 2.08 (1.00-4.34)* |
| Pan + Chemo            | 0.96 (0.43-2.13)  | 1.43 (0.65-3.18)  | 0.35 (0.12-1.03)       | 0.89 (0.45-1.78)  | 0.62 (0.23-1.69)  | 2.44 (1.34-4.44)*  | 2.51 (1.19-5.27)*  | 0.48 (0.23-1.00)* | Pan + Chemo       |

\*P<0.05. Bev, bevacizumab; Chemo, chemotherapy; UGT1A1, UDP glucuronosyltransferase family 1 member A1; VitC, vitamin C; FOLFIRI, 5-fluorouracil, leucovorin and irinotecan; FOLFOX, 5-fluorouracil, leucovorin and oxaliplatin; 5-FU/LV, 5-fluorouracil/leucovorin; Cet, cetuximab; Cet(maint.), Cet maintenance.

**Table SIV.** Safety profiles: Grade  $\geq 3$  TEAEs.

| Trial ID      | Year | Treatment arm 1        | Grade $\geq 3$ TEAEs (arm 1) | Treatment arm 2     | Grade $\geq 3$ TEAEs (arm 2) |
|---------------|------|------------------------|------------------------------|---------------------|------------------------------|
| NCT01161316   | 2018 | Cet(maint.)            | 70.0%                        | Cet + FOLFOX        | 68.0%                        |
| NCT02256800   | 2020 | Bev + FOLFIRI (UGT1A1) | 23.4%                        | Bev + FOLFIRI (std) | 23.6%                        |
| NCT00265850   | 2017 | Cet + Chemo            | 53.0%                        | Bev + Chemo         | 53.0%                        |
| NCT02394795   | 2023 | Pan + Chemo            | NR                           | Bev + Chemo         | NR                           |
| NCT01228734   | 2018 | Cet + FOLFOX           | 43.2%                        | FOLFOX              | 26.0%                        |
| NCT01991873   | 2021 | Pan + FU/FA            | 43.2%                        | FU/FA               | 26.0%                        |
| NCT04835142   | 2025 | A140 + FOLFOX          | 66.6%                        | Cet + FOLFOX        | 68.3%                        |
| NCT03206151   | 2025 | Cet- $\beta$ + FOLFIRI | 83.3%                        | FOLFIRI             | 66.9%                        |
| NCT02162563   | 2023 | Pan + Chemo            | 54.0%                        | Bev + Chemo         | 69.0%                        |
| Douillard2014 | 2014 | Pan + FOLFOX           | NR                           | FOLFOX              | NR                           |
| NCT00433927   | 2021 | Cet + FOLFIRI          | 64.0%                        | Bev + FOLFIRI       | 51.0%                        |
| Wang2022      | 2022 | VitC + Bev + FOLFOX    | 33.5%                        | Bev + FOLFOX        | 30.3%                        |
| NCT01328171   | 2019 | Pan + FOLFOX           | 81.3%                        | FOLFOX              | 66.7%                        |
| NCT02404935   | 2023 | Cet + FOLFIRI          | NR                           | FOLFIRI             | NR                           |
| NCT02904031   | 2019 | Pan + mFOLFOX          | 60.0%                        | 5-FU/LV + Pan       | 37.0%                        |

Bev, bevacizumab; Chemo, chemotherapy; FOLFIRI, 5-fluorouracil, leucovorin and irinotecan; FOLFOX, 5-fluorouracil, leucovorin and oxaliplatin; 5-FU/LV, 5-fluorouracil/leucovorin; FU/FA, fluorouracil/folinic acid; Cet, cetuximab; NMA, network meta-analysis; RE, random effects; Cet(maint.), Cet maintenance; VitC, vitamin C; UGT1A1, UDP glucuronosyltransferase family 1 member A1; mFOLFOX, modified FOLFOX; NR, not reported; std, standard dose; TEAEs, treatment-emergent adverse events.
